# Supplementary material
Source: publisher figshare collection journal article supplement (https://asha.figshare.com/articles/dataset/_/14830881)
Supplement: Supplementary file 1 [file 1]

**Supplemental Material S2.** Full set of responses to open-ended questions on the online survey. Please note that typos and language-based errors have not been corrected, but any identifying information has been removed (e.g., partner's name). Some participants used emojis in their typed responses; these have been reproduced via verbal descriptions.

**Please add any comments you want to share about your behavior during the coronavirus pandemic.**

- I got tested!
- My dad used to travel at half of a month that has ceased.
- Our adult children are bringing us anything we need that can not be ordered for delivery.
- No one, including family and friends, come into home other than a CareGiver (who had pre-quarantined for more than 14 days) and essential house repair people who are taking precautions per CDC guidelines.
- No comment
- Using telehealth when possible.
- We're staying in 90 percent of the time leaving the house about once every two weeks for fresh air exercise and deliver/swap essentials delivered for daughter or other elderly couple we've friended.
- Wearing masks when going inside coffeehouses or restaurants re: take-outs or when in grocery's, cleaners, etc. Do not wear a mask when out walking or socializing with friends, but do try to walk or talk with people within 3-6 feet apart:
- i watch on Zoom.
- Zoom
- None
- I cannot drive so relied on Uber, but cannot use Uber now, so very limited by transportation. I relied heavily on my gym for exercise, as well as community pool for swimming, but both are closed, and would not in any case. So exercise is limited to walking and Zumba and Tai Chi on Zoom. No social life beyond my immediate family. Cannot travel to see my children. My speech therapists were making house calls, but had to transfer to Zoom.

**Compared to before the coronavirus pandemic, are you spending less time, more time, or about the same amount of time (using technology, watching television, reading, enjoying other hobbies (please describe). Please add any comments you want to share about these activities:**

- I love technology before / after the pandemic
- Learning ukelele, knitting
- Yard work
- Spending more time gardening and also in working on needed house repairs, i.e., sewage replacement, air conditioning, gutter replacement, needed plumbing and window washing, among other things.
- K. reads audio books but does not physically read his books.
- Funny!
- None.

**Please add any comments you want to share about how your quality of life has changed.**

- It's not changing at all my life
- Things have gotten normal and made me pushed towards old hobbies and new hobbies. The new schedule will stick to me with new hobbies like learning the ukelele.
- Suck!
- [Name] is dependent on new stimulus taken from others and his changing surroundings. He has been very limited in ability to generate hobbies, activities himself; so, being limited to his home, his immediate family member, etc. has cut off outside stimulus other than "Zoom" and one on one visits with the SCC and family/friends.
- You don't want to know; it's been totally politicized
- I enjoyed going out to dinner but have not been doing that now.
- Spending less time out with friends and not planning usual summer trips away.
- I want to go back to class - stroke comeback sooner
- I'm speaking less, socializing less & exercising less.
- More quality time with family
- I feel like I am often waiting for life to move on and I wonder what the future will look like.
- I have epilepsy. I don't go out just to get around town. I like to be safe!
- social isolation has exacerbated my depression.
- None.
- The inability to Uber limits my transportation options. Because we can't fly, have not seen my children since XMAS.

**Please add any comments you want to share about how your friendships have changed.**

- With people that Are far take the time for example I talked my college roommate via zoom weekly.
- Almost non existent other than SCC
- None
- I have actually been speaking a little less to my friends sine this started since they are all in the restaurant indistury and their schedules have changed and are working more then before
- We all tend to stay at home more.
- Not getting together in person at all
- Re evaluate my friends. Stay away from stupid friends
- We keep in touch via texts, emails, phone calls, and Zoom but we miss seeing each other in person. I have gotten together with a couple of my friends in person and I feel lighter and happier after I've seen them and I feel that life will get better!
- Crazy
- i have strengthened my friendships with existing friends . the pandemic has made it more difficult to make new friends.

- None.
- I have good friends, but have not been able to visit with them.

**Please add any comments you want to share about these feelings of loneliness.**

- My friends are virtually
- I've been more isolated socially due to the pandemic
- My church is closed and I miss our church family. The studying, the fellowship, and the prayer in person is missing and I miss that, especially not knowing what the future will bring. Zoom meetings and church services online are okay, but it is not the same.
- (Emoji of face wearing a mask)
- None.
- I continue to have connections by social media, but it's not the same as being together, visiting with them, having dinners and so forth.

**Please add any comments you want to share about how your communication has changed.**

- I don't have the opportunity to talk to less people my speech has suffered.
- His online sessions are more focused and he is speaking with wife and CareGiver based on prompts we are learning from his sessions online!
- I haven't seen any change one way or another
- I've Apraxia
- My speech has deteriorated
- I got to do the VA PIRATE. It was good.
- In happy
- None.
- The need to communicate by social media may help with my apashia.

**Please add any comments you want to share about how your (talking, listening, reading, writing, and/or technology) skills have changed.**

- I am working so hard. I am not giving up!
- Writing
- I depend on family to set up technology. I cannot do it myself
- My speech reading and writing has deteriorated during the pandemic due to lack of use
- I'm not able to retrieve words as well as I did before I was isolating. Sharing a news story with my husband or a conversation I've had with a friend is more difficult than four months ago. I find when I listen to a TV news story I follow the beginning of it and then I often don't pick up dates, numbers, or names included in the story. This has been difficult for me since my stroke but I feel like it's even worse since the pandemic changed our lives.
- (Emoji of face with raised eyebrows)
- None.

**Please describe the changes in your communication with this person (or people) [primary communication partner]. How has it gotten easier or harder?**

- In-person conversations as well as texts are easier and more frequent.
- May not be easier but it's definitely improving and improved
- "It's about the same. Were both retired so being couped up together has become the new normal
- Covid didn't change that much."
- I rely on [name] to finish my sentences and know what I am trying to say
- About the same
- About the same
- Easier, I can say more words and I am using my text to talk better
- It is about the same.
- Thankfully my husband, [name] and I enjoy being together. I wish I could express myself better verbally and when writing. I get frustrated when I can't say or write what I want to. My husband is patient but I know it's not easy for him. Gratefully, we usually end up laughing after a miscommunication!
- Clean!
- None.
- We spend much more time together and have more logistics issues to discuss
- Partner can't understand nuances.

**Are you currently participating in virtual programs through the Stroke Comeback Center? yes/no If no, why not?**

- It's an amazing program had had helped a lot.
- Costly.
- It's closed
- Too Difficult for me to get on zoom by myself
- Don't want to -- want to wait to see people in person
- conflicting ime commitments
